# Supplementary material for: Epidermal Growth Factor Is Essential for the Maintenance of Novel Prostate Epithelial Cells Isolated From Patient-Derived Organoids
Source: Front Cell Dev Biol. 2020 Oct 29;8:571677. doi: 10.3389/fcell.2020.571677 (PMC7658326; doi:10.3389/fcell.2020.571677)
Supplement: Supplementary Table 8 — List of biological processes identified that are unique to the unaffected AUB-PrC cells vs. tissue. There were 41 terms showing top five significant enrichments of GO:0043065~positive regulation of apoptotic process (16 genes), GO:0001755~neural crest cell migration (6 genes), GO:0045746~negative regulation of Notch signaling pathway (5 genes), GO:2000379~positive regulation of reactive oxygen species metabolic process (5 genes), and GO:0090074~negative regulation of protein homodimerization activity (3 genes). [file Table_8.XLSX]

## Sheet: BP unaffected PreP cells vs tis
Category	Term	Count	%	PValue	Genes	List Total	Pop Hits	Pop Total	Fold Enrichment	Bonferroni	Benjamini	FDR
GOTERM_BP_DIRECT	GO:0043065~positive regulation of apoptotic process	16	3.42612	0.00279363	ENSG00000108984, ENSG00000116717, ENSG00000143801, ENSG00000104332, ENSG00000188763, ENSG00000134215, ENSG00000101188, ENSG00000105270, ENSG00000175592, ENSG00000112293, ENSG00000006327, ENSG00000100300, ENSG00000124766, ENSG00000141682, ENSG00000015475, ENSG00000148926	371	300	16792	2.41394	0.994609	0.994609	4.65917
GOTERM_BP_DIRECT	GO:0001755~neural crest cell migration	6	1.2848	0.00299539	ENSG00000165731, ENSG00000016082, ENSG00000185033, ENSG00000010319, ENSG00000082684, ENSG00000137872	371	45	16792	6.03486	0.996305	0.939214	4.98763
GOTERM_BP_DIRECT	GO:0045746~negative regulation of Notch signaling pathway	5	1.07066	0.00356274	ENSG00000128965, ENSG00000115844, ENSG00000187800, ENSG00000198435, ENSG00000185559	371	29	16792	7.8037	0.998723	0.891518	5.90556
GOTERM_BP_DIRECT	GO:2000379~positive regulation of reactive oxygen species metabolic process	5	1.07066	0.00404046	ENSG00000196139, ENSG00000116044, ENSG00000116717, ENSG00000100300, ENSG00000129465	371	30	16792	7.54358	0.999479	0.848884	6.67198
GOTERM_BP_DIRECT	GO:0090074~negative regulation of protein homodimerization activity	3	0.642398	0.00463347	ENSG00000016082, ENSG00000125968, ENSG00000115232	371	5	16792	27.1569	0.999828	0.823451	7.61519
GOTERM_BP_DIRECT	GO:0071526~semaphorin-plexin signaling pathway	5	1.07066	0.00572886	ENSG00000185033, ENSG00000196924, ENSG00000010319, ENSG00000082684, ENSG00000137872	371	33	16792	6.8578	0.999978	0.832665	9.33392
GOTERM_BP_DIRECT	GO:0030030~cell projection organization	5	1.07066	0.00572886	ENSG00000162004, ENSG00000036257, ENSG00000007174, ENSG00000146038, ENSG00000164087	371	33	16792	6.8578	0.999978	0.832665	9.33392
GOTERM_BP_DIRECT	GO:0007165~signal transduction	40	8.56531	0.00575242	ENSG00000189431, ENSG00000165731, ENSG00000163519, ENSG00000111252, ENSG00000091831, ENSG00000092964, ENSG00000141401, ENSG00000187889, ENSG00000083454, ENSG00000133121, ENSG00000120049, ENSG00000140600, ENSG00000107295, ENSG00000148926, ENSG00000108984, ENSG00000108797, ENSG00000134121, ENSG00000107742, ENSG00000188130, ENSG00000024526, ENSG00000108700, ENSG00000129465, ENSG00000171564, ENSG0000…	371	1161	16792	1.5594	0.999979	0.785336	9.37056
GOTERM_BP_DIRECT	GO:0050919~negative chemotaxis	5	1.07066	0.00638188	ENSG00000185070, ENSG00000185033, ENSG00000010319, ENSG00000082684, ENSG00000137872	371	34	16792	6.6561	0.999994	0.775559	10.3442
GOTERM_BP_DIRECT	GO:0007155~cell adhesion	20	4.28266	0.00655641	ENSG00000108797, ENSG00000134121, ENSG00000165124, ENSG00000111799, ENSG00000105664, ENSG00000115232, ENSG00000113296, ENSG00000112761, ENSG00000105711, ENSG00000115414, ENSG00000138028, ENSG00000107186, ENSG00000078098, ENSG00000090339, ENSG00000110031, ENSG00000038427, ENSG00000182667, ENSG00000186340, ENSG00000148848, ENSG00000168329	371	459	16792	1.97218	0.999995	0.744509	10.6124
GOTERM_BP_DIRECT	GO:0001501~skeletal system development	9	1.92719	0.0110119	ENSG00000123500, ENSG00000155090, ENSG00000124766, ENSG00000038427, ENSG00000197905, ENSG00000111799, ENSG00000142627, ENSG00000105664, ENSG00000113389	371	137	16792	2.97338	1	0.873477	17.209
GOTERM_BP_DIRECT	GO:0006968~cellular defense response	6	1.2848	0.011719	ENSG00000163519, ENSG00000139187, ENSG00000258227, ENSG00000146038, ENSG00000175592, ENSG00000168329	371	62	16792	4.38014	1	0.864771	18.2127
GOTERM_BP_DIRECT	GO:0055114~oxidation-reduction process	23	4.92505	0.0121016	ENSG00000196139, ENSG00000132746, ENSG00000090530, ENSG00000172782, ENSG00000002726, ENSG00000004961, ENSG00000176387, ENSG00000157214, ENSG00000139921, ENSG00000170509, ENSG00000122378, ENSG00000135437, ENSG00000116260, ENSG00000149809, ENSG00000129521, ENSG00000001630, ENSG00000255974, ENSG00000129151, ENSG00000182218, ENSG00000073737, ENSG00000140263, ENSG00000129167, ENSG00000196344	371	592	16792	1.75847	1	0.849575	18.7511
GOTERM_BP_DIRECT	GO:0007565~female pregnancy	7	1.49893	0.0138051	ENSG00000111371, ENSG00000115112, ENSG00000175592, ENSG00000149021, ENSG00000145244, ENSG00000176387, ENSG00000148926	371	89	16792	3.55989	1	0.864181	21.1077
GOTERM_BP_DIRECT	GO:0006656~phosphatidylcholine biosynthetic process	4	0.856531	0.0170396	ENSG00000164687, ENSG00000070214, ENSG00000101577, ENSG00000173868	371	25	16792	7.24183	1	0.89893	25.4065
GOTERM_BP_DIRECT	GO:0070372~regulation of ERK1 and ERK2 cascade	4	0.856531	0.0170396	ENSG00000115414, ENSG00000163491, ENSG00000170927, ENSG00000142627	371	25	16792	7.24183	1	0.89893	25.4065
GOTERM_BP_DIRECT	GO:0048843~negative regulation of axon extension involved in axon guidance	4	0.856531	0.0189541	ENSG00000185033, ENSG00000010319, ENSG00000082684, ENSG00000137872	371	26	16792	6.9633	1	0.907616	27.8459
GOTERM_BP_DIRECT	GO:0008347~glial cell migration	3	0.642398	0.0193842	ENSG00000100300, ENSG00000173546, ENSG00000038427	371	10	16792	13.5784	1	0.898135	28.3835
GOTERM_BP_DIRECT	GO:0016485~protein processing	6	1.2848	0.0212349	ENSG00000160613, ENSG00000099139, ENSG00000143801, ENSG00000156103, ENSG00000131187, ENSG00000135678	371	72	16792	3.77179	1	0.905316	30.654
GOTERM_BP_DIRECT	GO:2000352~negative regulation of endothelial cell apoptotic process	4	0.856531	0.0231257	ENSG00000116044, ENSG00000090339, ENSG00000171951, ENSG00000171564	371	28	16792	6.46592	1	0.911682	32.9037
GOTERM_BP_DIRECT	GO:1901653~cellular response to peptide	3	0.642398	0.0233507	ENSG00000102554, ENSG00000155090, ENSG00000125968	371	11	16792	12.344	1	0.901896	33.1668
GOTERM_BP_DIRECT	GO:0048266~behavioral response to pain	3	0.642398	0.0233507	ENSG00000113296, ENSG00000179403, ENSG00000100300	371	11	16792	12.344	1	0.901896	33.1668
GOTERM_BP_DIRECT	GO:0043542~endothelial cell migration	4	0.856531	0.0253829	ENSG00000078098, ENSG00000133121, ENSG00000171951, ENSG00000123159	371	29	16792	6.24296	1	0.90929	35.4994
GOTERM_BP_DIRECT	GO:0001525~angiogenesis	11	2.35546	0.0263921	ENSG00000102554, ENSG00000143556, ENSG00000006327, ENSG00000115414, ENSG00000078098, ENSG00000125968, ENSG00000173546, ENSG00000171951, ENSG00000134215, ENSG00000161791, ENSG00000169429	371	223	16792	2.23263	1	0.907255	36.629
GOTERM_BP_DIRECT	GO:0015807~L-amino acid transport	3	0.642398	0.0276182	ENSG00000103064, ENSG00000003989, ENSG00000111371	371	12	16792	11.3154	1	0.907148	37.9764
GOTERM_BP_DIRECT	GO:0042572~retinol metabolic process	4	0.856531	0.0277543	ENSG00000196139, ENSG00000135437, ENSG00000073737, ENSG00000196344	371	30	16792	6.03486	1	0.898204	38.1244
GOTERM_BP_DIRECT	GO:0030198~extracellular matrix organization	10	2.14133	0.0299713	ENSG00000123500, ENSG00000115414, ENSG00000179403, ENSG00000107742, ENSG00000090339, ENSG00000171564, ENSG00000038427, ENSG00000154175, ENSG00000105664, ENSG00000115232	371	196	16792	2.30926	1	0.906255	40.4872
GOTERM_BP_DIRECT	GO:0045765~regulation of angiogenesis	4	0.856531	0.0302395	ENSG00000006327, ENSG00000125968, ENSG00000104332, ENSG00000142627	371	31	16792	5.84019	1	0.89905	40.7671
GOTERM_BP_DIRECT	GO:2001244~positive regulation of intrinsic apoptotic signaling pathway	4	0.856531	0.0355487	ENSG00000129465, ENSG00000141682, ENSG00000163220, ENSG00000015475	371	33	16792	5.48624	1	0.925663	46.0614
GOTERM_BP_DIRECT	GO:0006919~activation of cysteine-type endopeptidase activity involved in apoptotic process	6	1.2848	0.0363303	ENSG00000165731, ENSG00000091592, ENSG00000129521, ENSG00000141682, ENSG00000163220, ENSG00000015475	371	83	16792	3.27191	1	0.922614	46.8021
GOTERM_BP_DIRECT	GO:0030207~chondroitin sulfate catabolic process	3	0.642398	0.0369961	ENSG00000173546, ENSG00000038427, ENSG00000113273	371	14	16792	9.69888	1	0.919027	47.4254
GOTERM_BP_DIRECT	GO:0030194~positive regulation of blood coagulation	3	0.642398	0.0369961	ENSG00000116044, ENSG00000131187, ENSG00000163220	371	14	16792	9.69888	1	0.919027	47.4254
GOTERM_BP_DIRECT	GO:0043433~negative regulation of sequence-specific DNA binding transcription factor activity	5	1.07066	0.0431036	ENSG00000178585, ENSG00000091831, ENSG00000125968, ENSG00000196924, ENSG00000153879	371	60	16792	3.77179	1	0.941373	52.8317
GOTERM_BP_DIRECT	GO:0009440~cyanate catabolic process	2	0.428266	0.0435844	ENSG00000128309, ENSG00000128311	371	2	16792	45.2615	1	0.937544	53.2342
GOTERM_BP_DIRECT	GO:0006810~transport	14	2.99786	0.0453035	ENSG00000125434, ENSG00000198691, ENSG00000196517, ENSG00000153923, ENSG00000171246, ENSG00000111886, ENSG00000075461, ENSG00000251595, ENSG00000103064, ENSG00000003989, ENSG00000083454, ENSG00000069849, ENSG00000100346, ENSG00000139194	371	348	16792	1.82086	1	0.938712	54.6474
GOTERM_BP_DIRECT	GO:0009967~positive regulation of signal transduction	5	1.07066	0.0453588	ENSG00000108797, ENSG00000111252, ENSG00000134215, ENSG00000152413, ENSG00000121594	371	61	16792	3.70996	1	0.93335	54.6922
GOTERM_BP_DIRECT	GO:0006955~immune response	16	3.42612	0.0464099	ENSG00000168067, ENSG00000049249, ENSG00000104998, ENSG00000128218, ENSG00000145416, ENSG00000108700, ENSG00000113749, ENSG00000132274, ENSG00000184451, ENSG00000153879, ENSG00000167664, ENSG00000141574, ENSG00000197646, ENSG00000213145, ENSG00000227357, ENSG00000169429	371	421	16792	1.72015	1	0.932021	55.5355
GOTERM_BP_DIRECT	GO:0061028~establishment of endothelial barrier	3	0.642398	0.0474031	ENSG00000092820, ENSG00000090339, ENSG00000179820	371	16	16792	8.48652	1	0.930519	56.3187
GOTERM_BP_DIRECT	GO:0008209~androgen metabolic process	3	0.642398	0.0474031	ENSG00000091831, ENSG00000073737, ENSG00000148926	371	16	16792	8.48652	1	0.930519	56.3187
GOTERM_BP_DIRECT	GO:0016486~peptide hormone processing	3	0.642398	0.0474031	ENSG00000160613, ENSG00000099139, ENSG00000145244	371	16	16792	8.48652	1	0.930519	56.3187
GOTERM_BP_DIRECT	GO:0016525~negative regulation of angiogenesis	5	1.07066	0.0476788	ENSG00000113296, ENSG00000142627, ENSG00000186340, ENSG00000135298, ENSG00000168329	371	62	16792	3.65012	1	0.926167	56.5339
GOTERM_BP_DIRECT	GO:0009611~response to wounding	5	1.07066	0.0500634	ENSG00000164687, ENSG00000111087, ENSG00000115414, ENSG00000148926, ENSG00000168329	371	63	16792	3.59218	1	0.930302	58.3533
GOTERM_BP_DIRECT	GO:0050727~regulation of inflammatory response	5	1.07066	0.0500634	ENSG00000003989, ENSG00000091592, ENSG00000091831, ENSG00000149021, ENSG00000204403	371	63	16792	3.59218	1	0.930302	58.3533
GOTERM_BP_DIRECT	GO:0032570~response to progesterone	4	0.856531	0.0541217	ENSG00000100300, ENSG00000166762, ENSG00000175592, ENSG00000025434	371	39	16792	4.6422	1	0.939652	61.2859
GOTERM_BP_DIRECT	GO:0006605~protein targeting	4	0.856531	0.0541217	ENSG00000131016, ENSG00000163812, ENSG00000069974, ENSG00000123159	371	39	16792	4.6422	1	0.939652	61.2859
GOTERM_BP_DIRECT	GO:0007169~transmembrane receptor protein tyrosine kinase signaling pathway	6	1.2848	0.0609985	ENSG00000165731, ENSG00000163519, ENSG00000185483, ENSG00000168398, ENSG00000074966, ENSG00000173546	371	96	16792	2.82884	1	0.954601	65.8161
GOTERM_BP_DIRECT	GO:0007411~axon guidance	8	1.71306	0.0624966	ENSG00000092820, ENSG00000185070, ENSG00000065675, ENSG00000105711, ENSG00000134121, ENSG00000092964, ENSG00000143590, ENSG00000072832	371	159	16792	2.27731	1	0.954471	66.7343
GOTERM_BP_DIRECT	GO:0061146~Peyer's patch morphogenesis	2	0.428266	0.0646608	ENSG00000165731, ENSG00000176678	371	3	16792	30.1743	1	0.955845	68.0201
GOTERM_BP_DIRECT	GO:2001257~regulation of cation channel activity	2	0.428266	0.0646608	ENSG00000120049, ENSG00000152413	371	3	16792	30.1743	1	0.955845	68.0201
GOTERM_BP_DIRECT	GO:0021772~olfactory bulb development	3	0.642398	0.0647111	ENSG00000115844, ENSG00000095713, ENSG00000092964	371	19	16792	7.14655	1	0.95247	68.0494
GOTERM_BP_DIRECT	GO:0007229~integrin-mediated signaling pathway	6	1.2848	0.067766	ENSG00000153071, ENSG00000074966, ENSG00000036257, ENSG00000134215, ENSG00000148848, ENSG00000115232	371	99	16792	2.74312	1	0.955811	69.7833
GOTERM_BP_DIRECT	GO:0030855~epithelial cell differentiation	5	1.07066	0.0685447	ENSG00000140519, ENSG00000128311, ENSG00000180340, ENSG00000073737, ENSG00000126778	371	70	16792	3.23296	1	0.95418	70.2109
GOTERM_BP_DIRECT	GO:0050850~positive regulation of calcium-mediated signaling	3	0.642398	0.0708838	ENSG00000163519, ENSG00000083454, ENSG00000095970	371	20	16792	6.78922	1	0.955827	71.4613
GOTERM_BP_DIRECT	GO:0071347~cellular response to interleukin-1	5	1.07066	0.0714362	ENSG00000090339, ENSG00000104332, ENSG00000108700, ENSG00000171564, ENSG00000169429	371	71	16792	3.18743	1	0.95381	71.7494
GOTERM_BP_DIRECT	GO:0042493~response to drug	12	2.56959	0.0748728	ENSG00000108984, ENSG00000165731, ENSG00000090339, ENSG00000100300, ENSG00000104332, ENSG00000092964, ENSG00000134215, ENSG00000175592, ENSG00000149021, ENSG00000002726, ENSG00000140263, ENSG00000176387	371	304	16792	1.78664	1	0.957517	73.4806
GOTERM_BP_DIRECT	GO:0006954~inflammatory response	14	2.99786	0.0759764	ENSG00000116044, ENSG00000065675, ENSG00000049249, ENSG00000008516, ENSG00000091592, ENSG00000168398, ENSG00000100739, ENSG00000108700, ENSG00000142627, ENSG00000134198, ENSG00000139187, ENSG00000171951, ENSG00000169429, ENSG00000163220	371	379	16792	1.67193	1	0.956667	74.015
GOTERM_BP_DIRECT	GO:0061337~cardiac conduction	4	0.856531	0.0764355	ENSG00000105711, ENSG00000120049, ENSG00000135750, ENSG00000075461	371	45	16792	4.02324	1	0.954625	74.2343
GOTERM_BP_DIRECT	GO:0006021~inositol biosynthetic process	2	0.428266	0.0852741	ENSG00000105655, ENSG00000141401	371	4	16792	22.6307	1	0.966495	78.1316
GOTERM_BP_DIRECT	GO:0003148~outflow tract septum morphogenesis	3	0.642398	0.090452	ENSG00000016082, ENSG00000169946, ENSG00000120149	371	23	16792	5.90367	1	0.97099	80.1496
GOTERM_BP_DIRECT	GO:0001836~release of cytochrome c from mitochondria	3	0.642398	0.090452	ENSG00000188763, ENSG00000141682, ENSG00000015475	371	23	16792	5.90367	1	0.97099	80.1496
GOTERM_BP_DIRECT	GO:0007050~cell cycle arrest	7	1.49893	0.0919215	ENSG00000108984, ENSG00000138028, ENSG00000116717, ENSG00000188130, ENSG00000036257, ENSG00000147883, ENSG00000169429	371	141	16792	2.24702	1	0.970692	80.6895
GOTERM_BP_DIRECT	GO:0006139~nucleobase-containing compound metabolic process	4	0.856531	0.0932042	ENSG00000137364, ENSG00000154027, ENSG00000092964, ENSG00000072832	371	49	16792	3.69481	1	0.970186	81.1495
GOTERM_BP_DIRECT	GO:0045880~positive regulation of smoothened signaling pathway	3	0.642398	0.0972895	ENSG00000111087, ENSG00000104332, ENSG00000146038	371	24	16792	5.65768	1	0.972827	82.5467
GOTERM_BP_DIRECT	GO:0030511~positive regulation of transforming growth factor beta receptor signaling pathway	3	0.642398	0.0972895	ENSG00000153071, ENSG00000147883, ENSG00000123159	371	24	16792	5.65768	1	0.972827	82.5467

## Sheet: PValue (0.05) cut
Category	Term	Count	%	PValue	Genes	List Total	Pop Hits	Pop Total	Fold Enrichment	Bonferroni	Benjamini	FDR
GOTERM_BP_DIRECT	GO:0043065~positive regulation of apoptotic process	16	3.42612	0.00279363	ENSG00000108984, ENSG00000116717, ENSG00000143801, ENSG00000104332, ENSG00000188763, ENSG00000134215, ENSG00000101188, ENSG00000105270, ENSG00000175592, ENSG00000112293, ENSG00000006327, ENSG00000100300, ENSG00000124766, ENSG00000141682, ENSG00000015475, ENSG00000148926	371	300	16792	2.41394	0.994609	0.994609	4.65917
GOTERM_BP_DIRECT	GO:0001755~neural crest cell migration	6	1.2848	0.00299539	ENSG00000165731, ENSG00000016082, ENSG00000185033, ENSG00000010319, ENSG00000082684, ENSG00000137872	371	45	16792	6.03486	0.996305	0.939214	4.98763
GOTERM_BP_DIRECT	GO:0045746~negative regulation of Notch signaling pathway	5	1.07066	0.00356274	ENSG00000128965, ENSG00000115844, ENSG00000187800, ENSG00000198435, ENSG00000185559	371	29	16792	7.8037	0.998723	0.891518	5.90556
GOTERM_BP_DIRECT	GO:2000379~positive regulation of reactive oxygen species metabolic process	5	1.07066	0.00404046	ENSG00000196139, ENSG00000116044, ENSG00000116717, ENSG00000100300, ENSG00000129465	371	30	16792	7.54358	0.999479	0.848884	6.67198
GOTERM_BP_DIRECT	GO:0090074~negative regulation of protein homodimerization activity	3	0.642398	0.00463347	ENSG00000016082, ENSG00000125968, ENSG00000115232	371	5	16792	27.1569	0.999828	0.823451	7.61519
GOTERM_BP_DIRECT	GO:0071526~semaphorin-plexin signaling pathway	5	1.07066	0.00572886	ENSG00000185033, ENSG00000196924, ENSG00000010319, ENSG00000082684, ENSG00000137872	371	33	16792	6.8578	0.999978	0.832665	9.33392
GOTERM_BP_DIRECT	GO:0030030~cell projection organization	5	1.07066	0.00572886	ENSG00000162004, ENSG00000036257, ENSG00000007174, ENSG00000146038, ENSG00000164087	371	33	16792	6.8578	0.999978	0.832665	9.33392
GOTERM_BP_DIRECT	GO:0007165~signal transduction	40	8.56531	0.00575242	ENSG00000189431, ENSG00000165731, ENSG00000163519, ENSG00000111252, ENSG00000091831, ENSG00000092964, ENSG00000141401, ENSG00000187889, ENSG00000083454, ENSG00000133121, ENSG00000120049, ENSG00000140600, ENSG00000107295, ENSG00000148926, ENSG00000108984, ENSG00000108797, ENSG00000134121, ENSG00000107742, ENSG00000188130, ENSG00000024526, ENSG00000108700, ENSG00000129465, ENSG00000171564, ENSG0000…	371	1161	16792	1.5594	0.999979	0.785336	9.37056
GOTERM_BP_DIRECT	GO:0050919~negative chemotaxis	5	1.07066	0.00638188	ENSG00000185070, ENSG00000185033, ENSG00000010319, ENSG00000082684, ENSG00000137872	371	34	16792	6.6561	0.999994	0.775559	10.3442
GOTERM_BP_DIRECT	GO:0007155~cell adhesion	20	4.28266	0.00655641	ENSG00000108797, ENSG00000134121, ENSG00000165124, ENSG00000111799, ENSG00000105664, ENSG00000115232, ENSG00000113296, ENSG00000112761, ENSG00000105711, ENSG00000115414, ENSG00000138028, ENSG00000107186, ENSG00000078098, ENSG00000090339, ENSG00000110031, ENSG00000038427, ENSG00000182667, ENSG00000186340, ENSG00000148848, ENSG00000168329	371	459	16792	1.97218	0.999995	0.744509	10.6124
GOTERM_BP_DIRECT	GO:0001501~skeletal system development	9	1.92719	0.0110119	ENSG00000123500, ENSG00000155090, ENSG00000124766, ENSG00000038427, ENSG00000197905, ENSG00000111799, ENSG00000142627, ENSG00000105664, ENSG00000113389	371	137	16792	2.97338	1	0.873477	17.209
GOTERM_BP_DIRECT	GO:0006968~cellular defense response	6	1.2848	0.011719	ENSG00000163519, ENSG00000139187, ENSG00000258227, ENSG00000146038, ENSG00000175592, ENSG00000168329	371	62	16792	4.38014	1	0.864771	18.2127
GOTERM_BP_DIRECT	GO:0055114~oxidation-reduction process	23	4.92505	0.0121016	ENSG00000196139, ENSG00000132746, ENSG00000090530, ENSG00000172782, ENSG00000002726, ENSG00000004961, ENSG00000176387, ENSG00000157214, ENSG00000139921, ENSG00000170509, ENSG00000122378, ENSG00000135437, ENSG00000116260, ENSG00000149809, ENSG00000129521, ENSG00000001630, ENSG00000255974, ENSG00000129151, ENSG00000182218, ENSG00000073737, ENSG00000140263, ENSG00000129167, ENSG00000196344	371	592	16792	1.75847	1	0.849575	18.7511
GOTERM_BP_DIRECT	GO:0007565~female pregnancy	7	1.49893	0.0138051	ENSG00000111371, ENSG00000115112, ENSG00000175592, ENSG00000149021, ENSG00000145244, ENSG00000176387, ENSG00000148926	371	89	16792	3.55989	1	0.864181	21.1077
GOTERM_BP_DIRECT	GO:0006656~phosphatidylcholine biosynthetic process	4	0.856531	0.0170396	ENSG00000164687, ENSG00000070214, ENSG00000101577, ENSG00000173868	371	25	16792	7.24183	1	0.89893	25.4065
GOTERM_BP_DIRECT	GO:0070372~regulation of ERK1 and ERK2 cascade	4	0.856531	0.0170396	ENSG00000115414, ENSG00000163491, ENSG00000170927, ENSG00000142627	371	25	16792	7.24183	1	0.89893	25.4065
GOTERM_BP_DIRECT	GO:0048843~negative regulation of axon extension involved in axon guidance	4	0.856531	0.0189541	ENSG00000185033, ENSG00000010319, ENSG00000082684, ENSG00000137872	371	26	16792	6.9633	1	0.907616	27.8459
GOTERM_BP_DIRECT	GO:0008347~glial cell migration	3	0.642398	0.0193842	ENSG00000100300, ENSG00000173546, ENSG00000038427	371	10	16792	13.5784	1	0.898135	28.3835
GOTERM_BP_DIRECT	GO:0016485~protein processing	6	1.2848	0.0212349	ENSG00000160613, ENSG00000099139, ENSG00000143801, ENSG00000156103, ENSG00000131187, ENSG00000135678	371	72	16792	3.77179	1	0.905316	30.654
GOTERM_BP_DIRECT	GO:2000352~negative regulation of endothelial cell apoptotic process	4	0.856531	0.0231257	ENSG00000116044, ENSG00000090339, ENSG00000171951, ENSG00000171564	371	28	16792	6.46592	1	0.911682	32.9037
GOTERM_BP_DIRECT	GO:1901653~cellular response to peptide	3	0.642398	0.0233507	ENSG00000102554, ENSG00000155090, ENSG00000125968	371	11	16792	12.344	1	0.901896	33.1668
GOTERM_BP_DIRECT	GO:0048266~behavioral response to pain	3	0.642398	0.0233507	ENSG00000113296, ENSG00000179403, ENSG00000100300	371	11	16792	12.344	1	0.901896	33.1668
GOTERM_BP_DIRECT	GO:0043542~endothelial cell migration	4	0.856531	0.0253829	ENSG00000078098, ENSG00000133121, ENSG00000171951, ENSG00000123159	371	29	16792	6.24296	1	0.90929	35.4994
GOTERM_BP_DIRECT	GO:0001525~angiogenesis	11	2.35546	0.0263921	ENSG00000102554, ENSG00000143556, ENSG00000006327, ENSG00000115414, ENSG00000078098, ENSG00000125968, ENSG00000173546, ENSG00000171951, ENSG00000134215, ENSG00000161791, ENSG00000169429	371	223	16792	2.23263	1	0.907255	36.629
GOTERM_BP_DIRECT	GO:0015807~L-amino acid transport	3	0.642398	0.0276182	ENSG00000103064, ENSG00000003989, ENSG00000111371	371	12	16792	11.3154	1	0.907148	37.9764
GOTERM_BP_DIRECT	GO:0042572~retinol metabolic process	4	0.856531	0.0277543	ENSG00000196139, ENSG00000135437, ENSG00000073737, ENSG00000196344	371	30	16792	6.03486	1	0.898204	38.1244
GOTERM_BP_DIRECT	GO:0030198~extracellular matrix organization	10	2.14133	0.0299713	ENSG00000123500, ENSG00000115414, ENSG00000179403, ENSG00000107742, ENSG00000090339, ENSG00000171564, ENSG00000038427, ENSG00000154175, ENSG00000105664, ENSG00000115232	371	196	16792	2.30926	1	0.906255	40.4872
GOTERM_BP_DIRECT	GO:0045765~regulation of angiogenesis	4	0.856531	0.0302395	ENSG00000006327, ENSG00000125968, ENSG00000104332, ENSG00000142627	371	31	16792	5.84019	1	0.89905	40.7671
GOTERM_BP_DIRECT	GO:2001244~positive regulation of intrinsic apoptotic signaling pathway	4	0.856531	0.0355487	ENSG00000129465, ENSG00000141682, ENSG00000163220, ENSG00000015475	371	33	16792	5.48624	1	0.925663	46.0614
GOTERM_BP_DIRECT	GO:0006919~activation of cysteine-type endopeptidase activity involved in apoptotic process	6	1.2848	0.0363303	ENSG00000165731, ENSG00000091592, ENSG00000129521, ENSG00000141682, ENSG00000163220, ENSG00000015475	371	83	16792	3.27191	1	0.922614	46.8021
GOTERM_BP_DIRECT	GO:0030207~chondroitin sulfate catabolic process	3	0.642398	0.0369961	ENSG00000173546, ENSG00000038427, ENSG00000113273	371	14	16792	9.69888	1	0.919027	47.4254
GOTERM_BP_DIRECT	GO:0030194~positive regulation of blood coagulation	3	0.642398	0.0369961	ENSG00000116044, ENSG00000131187, ENSG00000163220	371	14	16792	9.69888	1	0.919027	47.4254
GOTERM_BP_DIRECT	GO:0043433~negative regulation of sequence-specific DNA binding transcription factor activity	5	1.07066	0.0431036	ENSG00000178585, ENSG00000091831, ENSG00000125968, ENSG00000196924, ENSG00000153879	371	60	16792	3.77179	1	0.941373	52.8317
GOTERM_BP_DIRECT	GO:0009440~cyanate catabolic process	2	0.428266	0.0435844	ENSG00000128309, ENSG00000128311	371	2	16792	45.2615	1	0.937544	53.2342
GOTERM_BP_DIRECT	GO:0006810~transport	14	2.99786	0.0453035	ENSG00000125434, ENSG00000198691, ENSG00000196517, ENSG00000153923, ENSG00000171246, ENSG00000111886, ENSG00000075461, ENSG00000251595, ENSG00000103064, ENSG00000003989, ENSG00000083454, ENSG00000069849, ENSG00000100346, ENSG00000139194	371	348	16792	1.82086	1	0.938712	54.6474
GOTERM_BP_DIRECT	GO:0009967~positive regulation of signal transduction	5	1.07066	0.0453588	ENSG00000108797, ENSG00000111252, ENSG00000134215, ENSG00000152413, ENSG00000121594	371	61	16792	3.70996	1	0.93335	54.6922
GOTERM_BP_DIRECT	GO:0006955~immune response	16	3.42612	0.0464099	ENSG00000168067, ENSG00000049249, ENSG00000104998, ENSG00000128218, ENSG00000145416, ENSG00000108700, ENSG00000113749, ENSG00000132274, ENSG00000184451, ENSG00000153879, ENSG00000167664, ENSG00000141574, ENSG00000197646, ENSG00000213145, ENSG00000227357, ENSG00000169429	371	421	16792	1.72015	1	0.932021	55.5355
GOTERM_BP_DIRECT	GO:0061028~establishment of endothelial barrier	3	0.642398	0.0474031	ENSG00000092820, ENSG00000090339, ENSG00000179820	371	16	16792	8.48652	1	0.930519	56.3187
GOTERM_BP_DIRECT	GO:0008209~androgen metabolic process	3	0.642398	0.0474031	ENSG00000091831, ENSG00000073737, ENSG00000148926	371	16	16792	8.48652	1	0.930519	56.3187
GOTERM_BP_DIRECT	GO:0016486~peptide hormone processing	3	0.642398	0.0474031	ENSG00000160613, ENSG00000099139, ENSG00000145244	371	16	16792	8.48652	1	0.930519	56.3187
GOTERM_BP_DIRECT	GO:0016525~negative regulation of angiogenesis	5	1.07066	0.0476788	ENSG00000113296, ENSG00000142627, ENSG00000186340, ENSG00000135298, ENSG00000168329	371	62	16792	3.65012	1	0.926167	56.5339
